# Supplementary material for: An effective heuristic for developing hybrid feature selection in high dimensional and low sample size datasets
Source: Research Square preprint supplement (doi:10.21203/rs.3.rs-5260669/v1), 2024-12-16
Supplement: Supplementary file 1 [file 3651b565ea821ad441b1d62c.docx]

Table S1. Average number of features determined by GPF and HTS procedures. (Details of Table 5 in the text)

| No. |  | Dataset | Original(A) | GPF(B) | HTS(C) | Reduction Rate (1-B/A) | Selection Rate  (C/A) |
| --- | --- | --- | --- | --- | --- | --- | --- |
| 1 |  | ALLAML | 7,129 | 148 | 2 | 0.979 | 0.0003 |
| 2 |  | alon | 2,000 | 136 | 5 | 0.932 | 0.0025 |
| 3 |  | borovecki | 22,283 | 88 | 1 | 0.996 | 0.0000 |
| 4 |  | chiaretti | 12,625 | 233 | 5 | 0.982 | 0.0004 |
| 5 |  | chin | 22,215 | 321 | 5 | 0.986 | 0.0002 |
| 6 |  | chowdary | 22,283 | 200 | 2 | 0.991 | 0.0001 |
| 7 |  | GLI_85 | 22,283 | 246 | 4 | 0.989 | 0.0002 |
| 8 |  | gordon | 12,533 | 171 | 2 | 0.986 | 0.0002 |
| 9 |  | gravier | 2,905 | 246 | 9 | 0.915 | 0.0031 |
| 10 |  | pomeroy | 7,128 | 89 | 6 | 0.988 | 0.0008 |
| 11 |  | Prostate_GE | 5,966 | 242 | 5 | 0.959 | 0.0008 |
| 12 |  | shipp | 7,129 | 175 | 3 | 0.975 | 0.0004 |
| 13 |  | singh | 12,600 | 244 | 5 | 0.981 | 0.0004 |
| 14 |  | SMK_CAN_187 | 19,993 | 384 | 12 | 0.981 | 0.0006 |
| 15 |  | subramanian | 10,100 | 93 | 4 | 0.991 | 0.0004 |
| 16 |  | tian | 12,625 | 148 | 10 | 0.988 | 0.0008 |
| 17 |  | west | 7,129 | 86 | 3 | 0.988 | 0.0004 |
| 18 |  | arcene | 10,000 | 738 | 12 | 0.926 | 0.0012 |
| 19 |  | gisette | 5,000 | 1,957 | 12 | 0.609 | 0.0024 |
| 20 |  | Hill_Valley | 100 | 100 | 6 | 0.000 | 0.0600 |
| 21 |  | ionosphere | 33 | 33 | 4 | 0.000 | 0.1212 |
| 22 |  | madelon | 500 | 39 | 7 | 0.922 | 0.0140 |
| 23 |  | sonar | 60 | 60 | 6 | 0.000 | 0.1000 |
| 24 |  | wdbc | 30 | 30 | 3 | 0.000 | 0.1000 |

GPF: Gradual Permutation Filtering

HTS: Heuristic Tribrid Search

Table S2. Comparison of the number of selected features, AUC, and LCM between the proposed method and previous works using simple sequential search. (Details of Table 6 in the text)

|  | AUC | | | | | | Number of selected features | | | | | |
| --- | --- | --- | --- | --- | --- | --- | --- | --- | --- | --- | --- | --- |
| Data | FS | MR | PE | INF | GR | PRO | FS | MR | PE | INF | GR | PRO |
| ALLAML | 0.970 | 0.971 | 0.976 | 0.771 | 0.882 | **0.994** | 6 | 5 | 6 | 69 | 69 | **2** |
| Alon | 0.891 | **0.934** | 0.883 | 0.711 | 0.851 | 0.929 | 13 | 5 | **3** | 60 | 18 | 5 |
| borovecki | 0.926 | 0.964 | **1.000** | - | 0.924 | **1.000** | **1** | **1** | **1** | - | 2 | **1** |
| Chiaretti | 0.881 | 0.894 | 0.897 | 0.752 | 0.796 | **0.933** | 18 | 54 | 10 | 51 | 54 | **5** |
| Chin | 0.911 | 0.935 | 0.931 | - | 0.829 | **0.945** | 56 | **2** | **2** | - | 36 | 5 |
| chowdary | 0.981 | 0.980 | 0.978 | - | 0.935 | **0.990** | 78 | 41 | 6 | - | 97 | **2** |
| GLI_85 | 0.920 | 0.963 | 0.943 | - | 0.885 | **0.980** | 45 | **3** | 7 | - | 38 | 4 |
| Gordon | 0.990 | 0.990 | **0.999** | 0.965 | 0.948 | 0.998 | 3 | 33 | 3 | 12 | 25 | **2** |
| Gravier | 0.854 | **0.880** | 0.857 | 0.837 | 0.836 | **0.880** | 84 | 38 | 83 | 99 | 90 | **9** |
| pomeroy | 0.797 | 0.813 | 0.821 | 0.700 | 0.619 | **0.875** | **2** | 17 | 3 | 8 | 36 | 6 |
| Prostate_GE | **0.948** | 0.833 | 0.937 | 0.816 | 0.859 | 0.944 | 6 | 67 | 32 | 32 | 97 | **5** |
| shipp | 0.930 | 0.926 | 0.939 | 0.876 | 0.841 | **0.954** | 40 | 25 | 11 | 88 | 81 | **3** |
| singh | 0.940 | 0.953 | 0.943 | 0.876 | 0.835 | **0.982** | 14 | **4** | 9 | 93 | 69 | 5 |
| SMK_CAN_187 | 0.782 | 0.803 | 0.821 | 0.698 | 0.686 | **0.895** | 25 | 38 | **8** | 97 | 50 | 12 |
| subramanian | 0.905 | **0.909** | 0.856 | 0.651 | 0.639 | 0.874 | 7 | **4** | 31 | 13 | 11 | **4** |
| tian | 0.815 | 0.807 | 0.814 | 0.597 | 0.611 | **0.893** | 14 | 21 | 21 | **4** | 50 | 10 |
| west | 0.907 | 0.912 | **0.927** | 0.665 | 0.665 | 0.899 | **3** | 4 | 16 | 35 | 24 | **3** |
| Arcene | 0.820 | 0.704 | 0.893 | 0.871 | 0.797 | **0.950** | 98 | 39 | 76 | 87 | 96 | **12** |
| Gisette | 0.977 | 0.571 | **0.983** | 0.963 | - | 0.981 | 93 | 100 | 96 | 99 | - | **12** |
| Hill_Valley | 0.565 | 0.578 | 0.585 | 0.564 | 0.574 | **0.593** | 81 | 50 | 25 | 89 | 98 | **6** |
| ionosphere | 0.957 | **0.955** | 0.956 | 0.942 | 0.950 | 0.952 | 13 | 5 | 5 | 28 | 21 | **4** |
| madelon | 0.890 | 0.850 | 0.918 | 0.839 | - | **0.921** | 14 | 78 | 22 | 100 | - | **7** |
| sonar | 0.849 | 0.862 | 0.872 | 0.838 | 0.859 | **0.907** | 60 | 19 | 29 | 19 | 42 | **6** |
| wdbc | 0.983 | **0.983** | **0.983** | 0.981 | 0.982 | 0.980 | 16 | 15 | 16 | 22 | 25 | **3** |
| Best Case | 1 | 5 | 5 | 0 | 0 | **16** | 3 | 5 | 4 | 1 | 0 | **17** |

AUC: Area Under the Curve FS: F-statistics

MR: mRMR PE: Permutation

INF: Infinite feature selection GE: GRACES

PRO: Proposed method

Table S3. Comparison of the Log Reduction Rate and Log Comprehensive Metric between the proposed method and previous works using simple sequential search. (Details of Table 6 in the text)

|  | Log Reduction Rate | | | | | | Log Comprehensive Metric (*θ=0.8*) | | | | | |
| --- | --- | --- | --- | --- | --- | --- | --- | --- | --- | --- | --- | --- |
| Data | FS | MR | PE | INF | GR | PRO | FS | MR | PE | INF | GR | PRO |
| ALLAML | 0.798 | 0.819 | 0.798 | 0.523 | 0.523 | **0.922** | 0.936 | 0.941 | 0.940 | 0.721 | 0.811 | **0.979** |
| alon | 0.663 | 0.788 | **0.855** | 0.461 | 0.620 | 0.788 | 0.845 | **0.905** | 0.877 | 0.661 | 0.805 | 0.901 |
| borovecki | **1.000** | **1.000** | **1.000** | - | 0.931 | **1.000** | 0.941 | 0.971 | 1.000 | - | 0.925 | **1.000** |
| chiaretti | 0.694 | 0.578 | 0.756 | 0.584 | 0.578 | **0.830** | 0.844 | 0.831 | 0.869 | 0.718 | 0.752 | **0.912** |
| chin | 0.598 | **0.931** | **0.931** | - | 0.642 | 0.839 | 0.848 | **0.934** | 0.931 | - | 0.792 | 0.924 |
| chowdary | 0.565 | 0.629 | 0.821 | - | 0.543 | **0.931** | 0.898 | 0.910 | 0.946 | - | 0.857 | **0.978** |
| GLI_85 | 0.620 | **0.890** | 0.806 | - | 0.637 | 0.862 | 0.860 | 0.949 | 0.915 | - | 0.836 | **0.956** |
| gordon | 0.884 | 0.629 | 0.884 | 0.737 | 0.659 | **0.927** | 0.969 | 0.918 | 0.976 | 0.919 | 0.890 | **0.983** |
| gravier | 0.444 | 0.544 | 0.446 | 0.424 | 0.436 | **0.724** | 0.772 | 0.813 | 0.775 | 0.755 | 0.756 | **0.849** |
| pomeroy | **0.922** | 0.681 | 0.876 | 0.766 | 0.596 | 0.798 | 0.822 | 0.787 | 0.832 | 0.713 | 0.614 | **0.860** |
| Prostate_GE | 0.794 | 0.516 | 0.601 | 0.601 | 0.474 | **0.815** | 0.917 | 0.770 | 0.870 | 0.773 | 0.782 | **0.918** |
| shipp | 0.582 | 0.635 | 0.728 | 0.493 | 0.502 | **0.876** | 0.861 | 0.868 | 0.897 | 0.799 | 0.773 | **0.938** |
| singh | 0.720 | **0.853** | 0.767 | 0.520 | 0.552 | 0.830 | 0.896 | 0.933 | 0.908 | 0.804 | 0.778 | **0.952** |
| SMK_CAN_187 | 0.675 | 0.633 | **0.790** | 0.538 | 0.605 | 0.749 | 0.760 | 0.769 | 0.815 | 0.666 | 0.670 | **0.866** |
| subramanian | 0.789 | **0.850** | 0.628 | 0.722 | 0.740 | **0.850** | 0.882 | **0.898** | 0.810 | 0.665 | 0.659 | 0.869 |
| tian | 0.721 | 0.678 | 0.678 | **0.853** | 0.586 | 0.756 | 0.796 | 0.781 | 0.787 | 0.648 | 0.606 | **0.866** |
| west | **0.876** | 0.844 | 0.687 | 0.599 | 0.642 | **0.876** | **0.901** | 0.899 | 0.879 | 0.652 | 0.660 | 0.894 |
| arcene | 0.502 | 0.602 | 0.530 | 0.515 | 0.504 | **0.730** | 0.756 | 0.684 | 0.821 | 0.800 | 0.738 | **0.906** |
| gisette | 0.468 | 0.459 | 0.464 | 0.460 | - | **0.708** | 0.875 | 0.549 | 0.879 | 0.862 | - | **0.927** |
| Hill_Valley | 0.046 | 0.151 | 0.301 | 0.025 | 0.004 | **0.611** | 0.461 | 0.492 | 0.528 | 0.457 | 0.460 | **0.597** |
| ionosphere | 0.266 | 0.540 | 0.540 | 0.047 | 0.129 | **0.604** | 0.819 | 0.872 | 0.873 | 0.763 | 0.786 | **0.882** |
| madelon | 0.575 | 0.299 | 0.503 | 0.259 | - | **0.687** | 0.827 | 0.740 | 0.835 | 0.723 | - | **0.874** |
| sonar | 0.000 | 0.281 | 0.178 | 0.281 | 0.087 | **0.562** | 0.679 | 0.746 | 0.733 | 0.727 | 0.705 | **0.838** |
| wdbc | 0.185 | 0.204 | 0.185 | 0.091 | 0.054 | **0.677** | 0.823 | 0.827 | 0.824 | 0.803 | 0.796 | **0.919** |
| Best Case | 3 | 5 | 4 | 1 | 0 | **17** | 1 | 3 | 0 | 0 | 0 | **20** |

FS: F-statistics MR: mRMR

PE: Permutation INF: Infinite feature selection

GE: GRACES PRO: Proposed method

Table S4. Comparison of the number of selected features, AUC, and LCM between the proposed method and previous works using forward search. (Details of Table 7 in the text)

|  | AUC | | | | | | Number of selected features | | | | | |
| --- | --- | --- | --- | --- | --- | --- | --- | --- | --- | --- | --- | --- |
| Data | FS | MR | PE | INF | GR | PRO | FS | MR | PE | INF | GR | PRO |
| ALLAML | 0.975 | 0.975 | 0.975 | 0.856 | 0.856 | **0.994** | 3 | 3 | 3 | 7 | 7 | **2** |
| alon | 0.914 | 0.815 | 0.914 | 0.663 | 0.775 | **0.929** | 7 | 3 | 5 | **1** | 4 | 5 |
| borovecki | **1.000** | 0.973 | **1.000** | - | 0.969 | **1.000** | **1** | **1** | **1** | **-** | **1** | **1** |
| chiaretti | 0.876 | 0.862 | 0.911 | 0.626 | 0.626 | **0.933** | 8 | 4 | 8 | **1** | **1** | 5 |
| chin | 0.938 | 0.930 | 0.931 | - | 0.900 | **0.945** | 6 | 6 | 7 | **-** | **3** | 5 |
| chowdary | 0.984 | 0.984 | 0.978 | - | 0.951 | **0.990** | 4 | **2** | **2** | **-** | 7 | **2** |
| GLI_85 | 0.949 | 0.965 | 0.970 | - | 0.942 | **0.980** | **4** | 8 | 5 | **--** | 9 | **4** |
| gordon | 0.995 | 0.996 | 0.996 | 0.978 | 0.962 | **0.998** | 3 | **2** | **2** | 3 | 4 | **2** |
| gravier | 0.879 | 0.839 | 0.811 | 0.840 | 0.840 | **0.880** | 12 | 15 | **5** | 8 | 8 | 9 |
| pomeroy | 0.868 | 0.790 | 0.782 | 0.795 | 0.749 | **0.875** | 6 | 4 | 8 | 6 | **1** | 6 |
| Prostate_GE | 0.950 | 0.842 | **0.964** | 0.890 | 0.910 | 0.944 | 5 | 8 | **3** | 4 | 7 | 5 |
| shipp | 0.934 | 0.942 | 0.942 | 0.921 | 0.893 | **0.954** | **3** | 4 | 4 | 5 | 6 | **3** |
| singh | 0.956 | 0.955 | 0.951 | 0.894 | 0.708 | **0.982** | 5 | 5 | 6 | 10 | **1** | 5 |
| SMK_CAN_187 | 0.808 | 0.819 | 0.861 | 0.776 | 0.653 | **0.895** | 5 | 5 | 6 | 5 | **4** | 12 |
| subramanian | 0.892 | **0.936** | 0.857 | 0.664 | 0.730 | 0.874 | 6 | 4 | 4 | **2** | 4 | 4 |
| tian | 0.806 | 0.775 | 0.814 | 0.627 | 0.601 | **0.893** | 8 | 6 | 7 | **3** | 4 | 10 |
| west | **0.921** | 0.894 | 0.883 | 0.767 | 0.672 | 0.899 | 3 | **2** | 3 | 4 | 5 | 3 |
| arcene | 0.839 | 0.728 | 0.916 | 0.878 | 0.848 | **0.950** | **5** | 8 | 9 | 12 | 12 | 12 |
| gisette | 0.976 | 0.572 | 0.978 | 0.960 | **-** | **0.981** | 18 | 13 | **12** | 25 | **-** | **12** |
| Hill_Valley | 0.585 | 0.585 | 0.585 | 0.588 | 0.588 | **0.593** | 8 | 8 | 8 | 9 | 9 | **6** |
| ionosphere | 0.945 | 0.945 | 0.945 | 0.945 | 0.945 | **0.952** | 6 | 6 | 6 | 6 | 6 | **4** |
| madelon | 0.886 | 0.876 | 0.911 | 0.875 | **-** | **0.921** | 10 | **6** | 10 | 9 |  | 7 |
| sonar | 0.858 | 0.858 | 0.858 | 0.858 | 0.858 | **0.907** | **6** | **6** | **6** | **6** | **6** | **6** |
| wdbc | 0.980 | 0.980 | 0.980 | **0.981** | **0.981** | 0.980 | 9 | 9 | 9 | 7 | 7 | **3** |
| Best Case | 2 | 1 | 2 | 1 | 1 | **20** | 5 | 6 | 7 | 5 | 7 | **11** |

AUC: Area Under the Curve FS: F-statistics

MR: mRMR PE: Permutation

INF: Infinite feature selection GE: GRACES

PRO: Proposed method

Table S5. Comparison of Log Reduction Rate and Log Comprehensive Rate between the proposed method and previous works using forward search. (Details of Table 7 in the text)

|  | Log Reduction Rate | | | | | | Log Comprehensive Rate (*θ=0.8*) | | | | | |
| --- | --- | --- | --- | --- | --- | --- | --- | --- | --- | --- | --- | --- |
| Data | FS | MR | PE | INF | GR | PRO | FS | MR | PE | INF | GR | PRO |
| ALLAML | 0.876 | 0.876 | 0.876 | 0.781 | 0.781 | **0.922** | 0.955 | 0.955 | 0.955 | 0.841 | 0.841 | **0.979** |
| alon | 0.744 | 0.855 | 0.788 | **1.000** | 0.818 | 0.788 | 0.880 | 0.823 | 0.889 | 0.730 | 0.783 | **0.901** |
| borovecki | **1.000** | **1.000** | **1.000** | **-** | **1.000** | **1.000** | **1.000** | 0.978 | **1.000** | **-** | 0.975 | **1.000** |
| chiaretti | 0.780 | 0.853 | 0.780 | **1.000** | **1.000** | 0.830 | 0.857 | 0.860 | 0.885 | 0.701 | 0.701 | **0.912** |
| chin | 0.821 | 0.821 | 0.806 | **-** | **0.890** | 0.839 | 0.914 | 0.908 | 0.906 | **-** | 0.898 | **0.924** |
| chowdary | 0.862 | **0.931** | **0.931** | **-** | 0.806 | **0.931** | 0.959 | 0.973 | 0.968 | **-** | 0.922 | **0.978** |
| GLI_85 | **0.862** | 0.792 | 0.839 | **-** | 0.781 | **0.862** | 0.932 | 0.930 | 0.944 | **-** | 0.909 | **0.956** |
| gordon | 0.884 | **0.927** | **0.927** | 0.884 | 0.853 | **0.927** | 0.973 | 0.982 | 0.982 | 0.959 | 0.940 | **0.983** |
| gravier | 0.688 | 0.660 | **0.798** | 0.739 | 0.739 | 0.724 | 0.841 | 0.803 | 0.809 | 0.820 | 0.820 | **0.849** |
| pomeroy | 0.798 | 0.844 | 0.766 | 0.798 | **1.000** | 0.798 | 0.854 | 0.801 | 0.778 | 0.795 | 0.800 | **0.860** |
| Prostate_GE | 0.815 | 0.761 | **0.874** | 0.841 | 0.776 | 0.815 | 0.923 | 0.826 | **0.946** | 0.880 | 0.884 | 0.918 |
| shipp | **0.876** | 0.843 | 0.843 | 0.818 | 0.797 | **0.876** | 0.923 | 0.922 | 0.922 | 0.901 | 0.874 | **0.938** |
| singh | 0.830 | 0.830 | 0.810 | 0.756 | **1.000** | 0.830 | 0.931 | 0.930 | 0.923 | 0.866 | 0.766 | **0.952** |
| SMK_CAN_187 | 0.837 | 0.837 | 0.819 | 0.837 | **0.860** | 0.749 | 0.814 | 0.823 | 0.853 | 0.788 | 0.695 | **0.866** |
| subramanian | 0.806 | 0.850 | 0.850 | **0.925** | 0.850 | 0.850 | 0.875 | **0.918** | 0.855 | 0.716 | 0.754 | 0.869 |
| tian | 0.780 | 0.810 | 0.794 | **0.884** | 0.853 | 0.756 | 0.801 | 0.782 | 0.810 | 0.678 | 0.651 | **0.866** |
| west | 0.876 | **0.922** | 0.876 | 0.844 | 0.819 | 0.876 | **0.912** | 0.900 | 0.881 | 0.783 | 0.701 | 0.894 |
| arcene | **0.825** | 0.774 | 0.761 | 0.730 | 0.730 | 0.730 | 0.836 | 0.738 | 0.885 | 0.848 | 0.824 | **0.906** |
| gisette | 0.661 | 0.699 | **0.708** | 0.622 | **-** | **0.708** | 0.913 | 0.597 | 0.924 | 0.892 | **-** | **0.927** |
| Hill_Valley | 0.548 | 0.548 | 0.548 | 0.523 | 0.523 | **0.611** | 0.577 | 0.577 | 0.577 | 0.575 | 0.575 | **0.597** |
| ionosphere | 0.488 | 0.488 | 0.488 | 0.488 | 0.488 | **0.604** | 0.854 | 0.854 | 0.854 | 0.854 | 0.854 | **0.882** |
| madelon | 0.629 | **0.712** | 0.629 | 0.646 | **-** | 0.687 | 0.834 | 0.843 | 0.855 | 0.830 | **-** | **0.874** |
| sonar | **0.562** | **0.562** | **0.562** | **0.562** | **0.562** | **0.562** | 0.799 | 0.799 | 0.799 | 0.799 | 0.799 | **0.838** |
| wdbc | 0.354 | 0.354 | 0.354 | 0.428 | 0.428 | **0.677** | 0.855 | 0.855 | 0.855 | 0.870 | 0.870 | **0.919** |
| Best Case | 5 | 6 | 7 | 5 | 7 | **11** | 2 | 1 | 2 | 0 | 0 | **21** |

FS: F-statistics MR: mRMR

PE: Permutation INF: Infinite feature selection

GE: GRACES PRO: Proposed method

Table S6. Average runtimes of proposed method over 30 iterations for the HDLSS datasets

| No. | Dataset | Total | GPF | HTS |
| --- | --- | --- | --- | --- |
| 1 | ALLAML | 38.7 | 12±0.1 | 26.7±0.3 |
| 2 | alon | 82.7 | 7.9±0.1 | 74.8±0.3 |
| 3 | arcene | 703.0 | 43.5±0.2 | 659.5±1.4 |
| 4 | borovecki | 24.0 | 16.6±0.1 | 7.4±1.4 |
| 5 | chiaretti | 260.1 | 29.6±0.3 | 230.5±0.6 |
| 6 | chin | 248.5 | 34.9±0.2 | 213.6±0.7 |
| 7 | chowdary | 76.0 | 27.4±0.1 | 48.6±1.2 |
| 8 | GLI_85 | 114.0 | 27.2±0.2 | 86.8±1 |
| 9 | gordon | 46.5 | 25±0.2 | 21.5±0.7 |
| 10 | gravier | 196.6 | 21.4±0.1 | 175.2±0.3 |
| 11 | pomeroy | 80.9 | 12.4±0.2 | 68.5±0.8 |
| 12 | Prostate_GE | 164.7 | 15.3±0.1 | 149.3±0.4 |
| 13 | shipp | 58.6 | 12.7±0.1 | 45.9±0.3 |
| 14 | singh | 234.0 | 21.9±0.1 | 212±0.4 |
| 15 | SMK_CAN_187 | 414.6 | 63.9±0.2 | 350.7±1 |
| 16 | subramanian | 57.3 | 12.6±0.1 | 44.7±0.2 |
| 17 | tian | 196.9 | 33.4±0.2 | 163.4±0.7 |
| 18 | west | 36.6 | 10.9±0.1 | 25.7±0.4 |

GPF: Gradual Permutation Filtering

HTS: Heuristic Tribrid Search
